# Supplementary material for: Meta-Analysis Assessing Potential of Drone Remote Sensing in Estimating Plant Traits Related to Nitrogen Use Efficiency
Source: MDPI journal article supplement (doi:10.3390/rs16050838), 2024-02-28
Supplement: s1 [file s1]

# Meta-Analysis Assessing Potential of Drone Remote Sensing in Estimating Plant Traits Related to Nitrogen Use Efficiency

Jingcheng Zhang, Yuncai Hu, Fei Li, Kadeghe G. Fue and Kang Yu

## Category

|                                                                                                                                                                                              |   |
|----------------------------------------------------------------------------------------------------------------------------------------------------------------------------------------------|---|
| Table S1 Regression models without moderator (Null) and with one moderator (Sensor Type, Crop, Signal Processing Technique, Growth Stage, $R^2$ Type, respectively) for Plant Height.....    | 1 |
| Table S2 Regression models without moderator (Null) and with one moderator (Sensor Type, Crop, Signal Processing Technique, Growth Stage, $R^2$ Type, respectively) for Grain Yield. ....    | 2 |
| Table S3 Regression models without moderator (Null) and with one moderator (Sensor Type, Crop, Signal Processing Technique, Growth Stage, $R^2$ Type, respectively) for Leaf Area Index..... | 3 |
| Figure S1 Observed Fisher's $Z$ effect sizes with their 95% confidence interval for Grain Yield. ....                                                                                        | 4 |
| Figure S2 Observed Fisher's $Z$ effect sizes with their 95% confidence interval for Leaf Area Index.....                                                                                     | 5 |
| Figure S3 Observed Fisher's $Z$ effect sizes with their 95% confidence interval for Plant Height.....                                                                                        | 6 |

**Table S1.** Regression models without moderator (Null) and with one moderator (Sensor Type, Crop, Signal Processing Technique, Growth Stage,  $R^2$  Type, respectively) for Plant Height. Esti.: Estimated Coefficient; SE: Standard Error;  $\Pr(>|t|)$ : p-value; F: F-statistic; df: degrees of freedom; num: Numerator Degrees of Freedom; den: Denominator Degrees of Freedom; p: p-value;  $ICC$ : Intra-class Correlation Coefficient;  $R^2_{(2)}$ : proportion of the variance at the study level;  $R^2_{(3)}$ : proportion of the variance at the data set level; MS: Multispectral sensor; HSI: Hyperspectral sensor. Significance levels: \*\*\* $p<0.001$ , \*\* $p<0.01$ , \* $p<0.05$

| Moderator                   | Regression Model Statistics |                      |             | Anova Test |            |       | Variance of Effect |         | Heterogeneity Measures |             |             |
|-----------------------------|-----------------------------|----------------------|-------------|------------|------------|-------|--------------------|---------|------------------------|-------------|-------------|
| Null                        | Fixed Effects               |                      |             | F          | df         | $p$   | Level 2            | Level 3 | $ICC$                  | $R^2_{(2)}$ | $R^2_{(3)}$ |
|                             | Esti.                       | SE                   | $\Pr(> t )$ |            | (num; den) |       | 0.123              | 0.314   | 0.281                  |             |             |
|                             | 1.378                       | 0.311                | 0.159       |            |            |       |                    |         |                        |             |             |
| Sensor Type                 |                             |                      |             | 32.927     | 2; 6       | 0.001 | 0.104              | 0.314   | 0.248                  | 0           | 0           |
| RGB                         | 1.74                        | 0.456                | 0.005**     |            |            |       |                    |         |                        |             |             |
| RGB, MS                     | 1.112                       | 0.385                | 0.020*      |            |            |       |                    |         |                        |             |             |
| Crop                        |                             |                      |             | -          | -          | -     | 0.104              | 0.314   | 0.248                  | 0           | 0           |
| Rice                        | 1.112                       | 0.385                | 0.020*      |            |            |       |                    |         |                        |             |             |
| Winter Wheat                | 1.74                        | 0.456                | 0.005**     |            |            |       |                    |         |                        |             |             |
| Signal Processing Technique |                             |                      |             | 12.061     | 1; 6       | 0.013 | 0.574              | 0.073   | 0.887                  | 0           | 0.502       |
| Multivariate                | 2.256                       | 0.567                | 0.129       |            |            |       |                    |         |                        |             |             |
| Non-linear                  |                             |                      |             |            |            |       |                    |         |                        |             |             |
| Univariate                  | 1.191                       | 0.546                | 0.274       |            |            |       |                    |         |                        |             |             |
| Growth Stage                |                             |                      |             | 0.355      | 1; 6       | 0.573 | 0.559              | 0.08    | 0.874                  | 0           | 0.452       |
| All                         | 2.247                       | 0.564                | 0.126       |            |            |       |                    |         |                        |             |             |
| Late                        | 1.148                       | 0.544                | 0.276       |            |            |       |                    |         |                        |             |             |
| Medium                      | 1.295                       | 0.566                | 0.227       |            |            |       |                    |         |                        |             |             |
| $R^2$ Type                  |                             |                      |             | -          | -          | -     | 0                  | 0.064   | 0                      | 1           | 0.564       |
| Calibration                 | 0.648                       | 0.126                | 0.000***    |            |            |       |                    |         |                        |             |             |
| Validation                  | 1.735                       | 0.103                | 0.000***    |            |            |       |                    |         |                        |             |             |
| Number of obs: 10           |                             | Number of studies: 2 |             |            |            |       |                    |         |                        |             |             |

**Table S2.** Regression models without moderator (Null) and with one moderator (Sensor Type, Crop, Signal Processing Technique, Growth Stage,  $R^2$  Type, respectively) for Grain Yield. Esti.: Estimated Coefficient; SE: Standard Error;  $\Pr(>|t|)$ : p-value; F: F-statistic; df: degrees of freedom; num: Numerator Degrees of Freedom; den: Denominator Degrees of Freedom; p: p-value; ICC: Intra-class Correlation Coefficient;  $R^2_{(2)}$ : proportion of the variance at the study level;  $R^2_{(3)}$ : proportion of the variance at the data set level; MS: Multispectral sensor; HSI: Hyperspectral sensor. Significance levels: \*\*\*p<0.001, \*\*p<0.01, \*p<0.05

| Moderator                   | Regression Model Statistics |                      |           | Anova Test |            |       | Variance of Effect |         | Heterogeneity Measures |                               |                               |
|-----------------------------|-----------------------------|----------------------|-----------|------------|------------|-------|--------------------|---------|------------------------|-------------------------------|-------------------------------|
| Null                        | Fixed Effects               |                      |           | F          | df         | p     | Level 2            | Level 3 | ICC                    | R <sup>2</sup> <sub>(2)</sub> | R <sup>2</sup> <sub>(3)</sub> |
|                             | Esti.                       | SE                   | Pr(> t )  |            | (num; den) |       | 0.099              | 0.154   | 0.391                  |                               |                               |
|                             | 1.269                       | 0.149                | 0.001***  |            |            |       |                    |         |                        |                               |                               |
| Sensor Type                 |                             |                      |           | 59.187     | 8; 90      | 0     | 0.074              | 0.047   | 0.608                  | 0                             | 0.676                         |
| HSI                         | 1.363                       | 0.282                | 0.041*    |            |            |       |                    |         |                        |                               |                               |
| HSI, LiDAR                  | 1.352                       | 0.2766               | 0.047*    |            |            |       |                    |         |                        |                               |                               |
| HSI, LiDAR, Thermal         | 1.342                       | 0.282                | 0.042*    |            |            |       |                    |         |                        |                               |                               |
| LiDAR                       | 0.509                       | 0.277                | 0.218     |            |            |       |                    |         |                        |                               |                               |
| MS                          | 1.201                       | 0.165                | 0.017*    |            |            |       |                    |         |                        |                               |                               |
| RGB                         | 1.267                       | 0.183                | 0.005**   |            |            |       |                    |         |                        |                               |                               |
| RGB, MS                     | 1.708                       | 0.276                | 0.031*    |            |            |       |                    |         |                        |                               |                               |
| Thermal                     | 0.415                       | 0.282                | 0.280     |            |            |       |                    |         |                        |                               |                               |
| Crop                        |                             |                      |           | 0.474      | 1; 90      | 0.493 | 0.261              | 0.154   | 0.629                  | 0                             | 0                             |
| Barley                      | 1.156                       | 0.526                | 0.258     |            |            |       |                    |         |                        |                               |                               |
| Camelina                    | 0.979                       | 0.535                | 0.292     |            |            |       |                    |         |                        |                               |                               |
| Maize                       | 1.339                       | 0.365                | 0.170     |            |            |       |                    |         |                        |                               |                               |
| Winter Wheat                | 1.504                       | 0.523                | 0.203     |            |            |       |                    |         |                        |                               |                               |
| Signal Processing Technique |                             |                      |           | 3.606      | 1; 90      | 0.061 | 0.141              | 0.154   | 0.478                  | 0                             | 0                             |
| Multivariate Linear         | 1.504                       | 0.392                | 0.054     |            |            |       |                    |         |                        |                               |                               |
| Multivariate Non-linear     | 1.336                       | 0.271                | 0.040*    |            |            |       |                    |         |                        |                               |                               |
| Physically Based            | 1.117                       | 0.133                | 0.000***  |            |            |       |                    |         |                        |                               |                               |
| Univariate                  | 1.070                       | 0.284                | 0.048*    |            |            |       |                    |         |                        |                               |                               |
| Growth Stage                |                             |                      |           | 6.962      | 1; 90      | 0.01  | 0.113              | 0.152   | 0.426                  | 0                             | 0                             |
| All                         | 1.071                       | 0.258                | 0.046*    |            |            |       |                    |         |                        |                               |                               |
| Early                       | 1.043                       | 0.297                | 0.028*    |            |            |       |                    |         |                        |                               |                               |
| Late                        | 1.289                       | 0.251                | 0.039*    |            |            |       |                    |         |                        |                               |                               |
| Medium                      | 1.708                       | 0.348                | 0.047*    |            |            |       |                    |         |                        |                               |                               |
| R <sup>2</sup> Type         |                             |                      |           | 5.376      | 1; 90      | 0.023 | 0.103              | 0.153   | 0.403                  | 0                             | 0                             |
| Calibration                 | 1.356                       | 0.169                | 0.000 *** |            |            |       |                    |         |                        |                               |                               |
| Validation                  | 1.246                       | 0.153                | 0.000 *** |            |            |       |                    |         |                        |                               |                               |
| Number of obs: 102          |                             | Number of studies: 5 |           |            |            |       |                    |         |                        |                               |                               |

**Table S3.** Regression models without moderator (Null) and with one moderator (Sensor Type, Crop, Signal Processing Technique, Growth Stage,  $R^2$  Type, respectively) for Leaf Area Index. Esti.: Estimated Coefficient; SE: Standard Error; Pr(>|t|): p-value; F: F-statistic; df: degrees of freedom; num: Numerator Degrees of Freedom; den: Denominator Degrees of Freedom; p: p-value; ICC: Intra-class Correlation Coefficient;  $R^2_{(2)}$ : proportion of the variance at the study level;  $R^2_{(3)}$ : proportion of the variance at the data set level; MS: Multispectral sensor; HSI: Hyperspectral sensor. Significance levels: \*\*\*p<0.001, \*\*p<0.01, \*p<0.05

| Moderator                         | Regression Model Statistics |                      |          | Anova Test |            |       | Variance of Effect |         | Heterogeneity Measures |             |             |
|-----------------------------------|-----------------------------|----------------------|----------|------------|------------|-------|--------------------|---------|------------------------|-------------|-------------|
|                                   | Fixed Effects               |                      |          | F          | df         | p     | Level 2            | Level 3 | ICC                    | $R^2_{(2)}$ | $R^2_{(3)}$ |
| Null                              | Esti.                       | SE                   | Pr(> t ) |            | (num; den) |       | 0.111              | 0.069   | 0.617                  |             |             |
|                                   | 1.448                       | 0.175                | 0.006**  |            |            |       |                    |         |                        |             |             |
| Sensor Type                       |                             |                      |          | 116.97     | 4; 43      | 0     | 0.098              | 0.069   | 0.586                  | 0           | 0.528       |
| HSI                               | 1.398                       | 0.334                | 0.000*** |            |            |       |                    |         |                        |             |             |
| MS                                | 1.314                       | 0.315                | 0.000*** |            |            |       |                    |         |                        |             |             |
| RGB                               | 2.039                       | 0.347                | 0.000*** |            |            |       |                    |         |                        |             |             |
| RGB, MS                           | 1.226                       | 0.328                | 0.000*** |            |            |       |                    |         |                        |             |             |
| Crop                              |                             |                      |          | 1.221      | 3; 43      | 0.314 | 0.204              | 0.071   | 0.742                  | 0           | 0.515       |
| Canola                            | 1.714                       | 0.408                | 0.004**  |            |            |       |                    |         |                        |             |             |
| Canola, Soybean, and Winter Wheat | 1.785                       | 0.362                | 0.005**  |            |            |       |                    |         |                        |             |             |
| Rice                              | 1.226                       | 0.463                | 0.144    |            |            |       |                    |         |                        |             |             |
| Soybean                           | 1.800                       | 0.408                | 0.003**  |            |            |       |                    |         |                        |             |             |
| Winter Wheat                      | 1.500                       | 0.279                | 0.037*   |            |            |       |                    |         |                        |             |             |
| Signal Processing Technique       |                             |                      |          | 79.45      | 1; 43      | 0     | 0.424              | 0.041   | 0.912                  | 0           | 0.721       |
| Multivariate                      | 2.056                       | 0.342                | 0.007**  |            |            |       |                    |         |                        |             |             |
| Non-linear                        |                             |                      |          |            |            |       |                    |         |                        |             |             |
| Univariate                        | 1.178                       | 0.333                | 0.040*   |            |            |       |                    |         |                        |             |             |
| Growth Stage                      |                             |                      |          | 2.071      | 2; 43      | 0.14  | 0.131              | 0.068   | 0.658                  | 0           | 0.534       |
| All                               | 1.538                       | 0.194                | 0.005**  |            |            |       |                    |         |                        |             |             |
| Late                              | 1.459                       | 0.196                | 0.005**  |            |            |       |                    |         |                        |             |             |
| Medium                            | 1.392                       | 0.200                | 0.004**  |            |            |       |                    |         |                        |             |             |
| $R^2$ Type                        |                             |                      |          | 30.101     | 1; 43      | 0     | 0.127              | 0.068   | 0.651                  | 0           | 0.534       |
| Calibration                       | 1.540                       | 0.193                | 0.004**  |            |            |       |                    |         |                        |             |             |
| Validation                        | 1.452                       | 0.188                | 0.006**  |            |            |       |                    |         |                        |             |             |
| Number of obs: 54                 |                             | Number of studies: 4 |          |            |            |       |                    |         |                        |             |             |

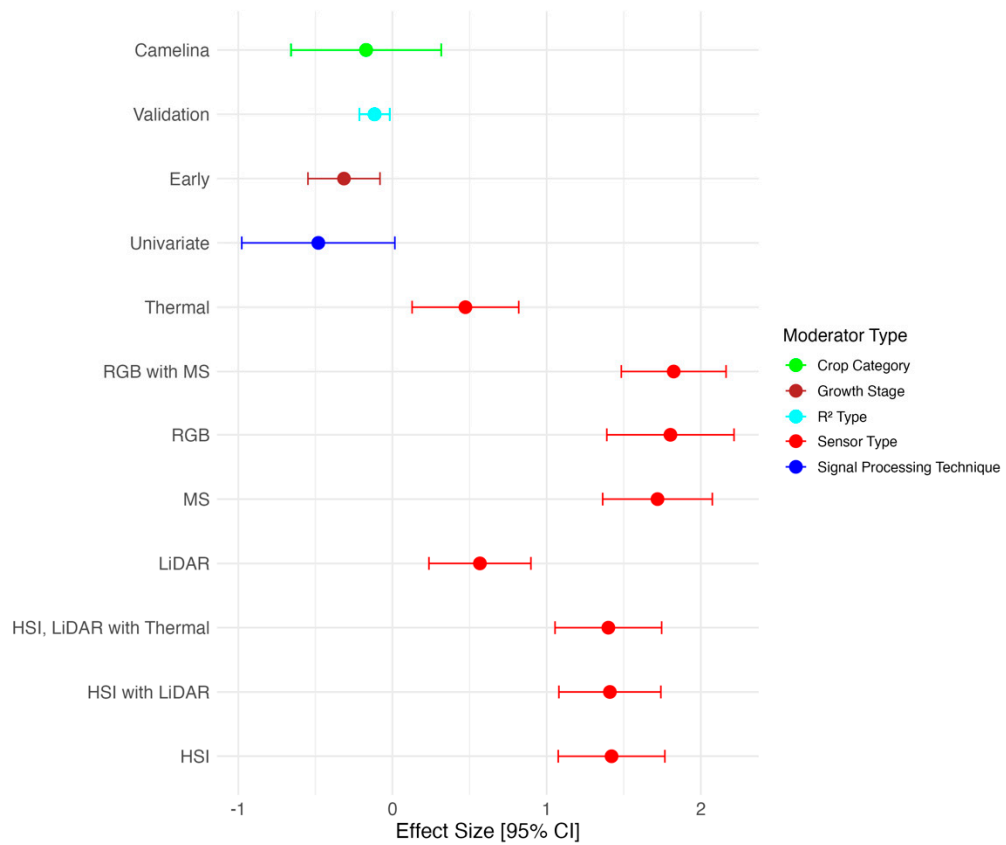

**Figure S1.** Observed Fisher's  $Z$  effect sizes with their 95% confidence interval for Grain Yield. HSI: Hyperspectral sensors; MS: Multispectral sensor; LiDAR: Light Detection and Ranging.

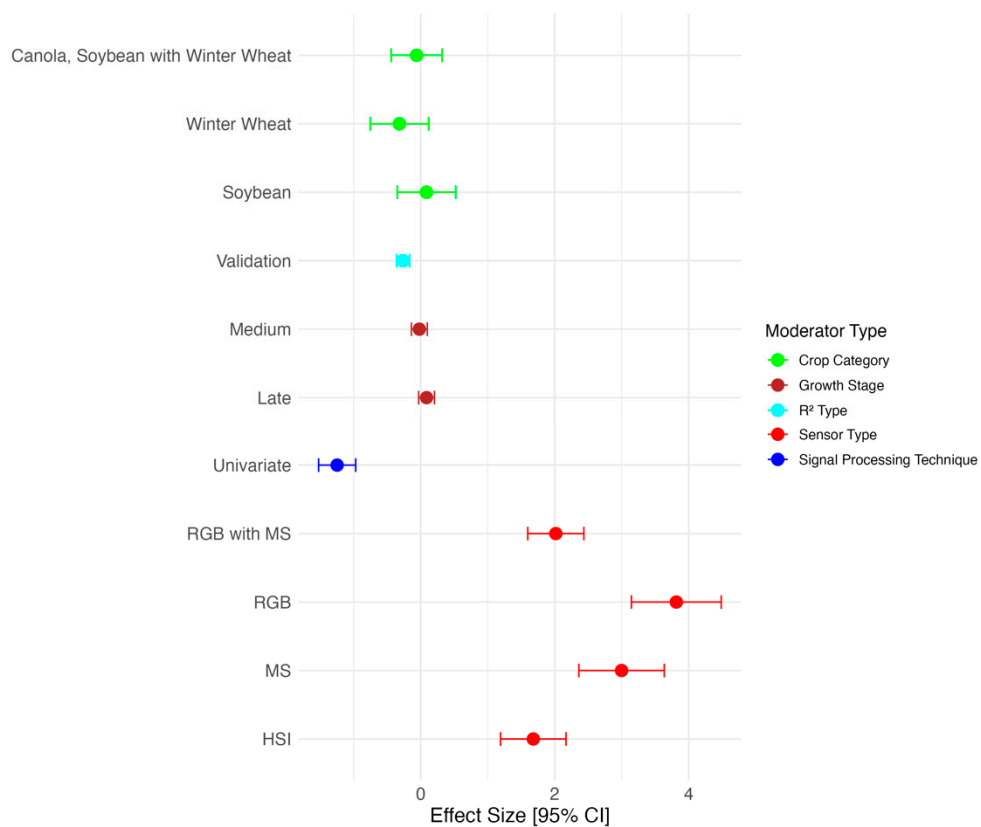

**Figure S2.** Observed Fisher's  $Z$  effect sizes with their 95% confidence interval for Leaf Area Index. HSI: Hyperspectral sensors; MS: Multispectral sensors. LiDAR: Light Detection and Ranging.

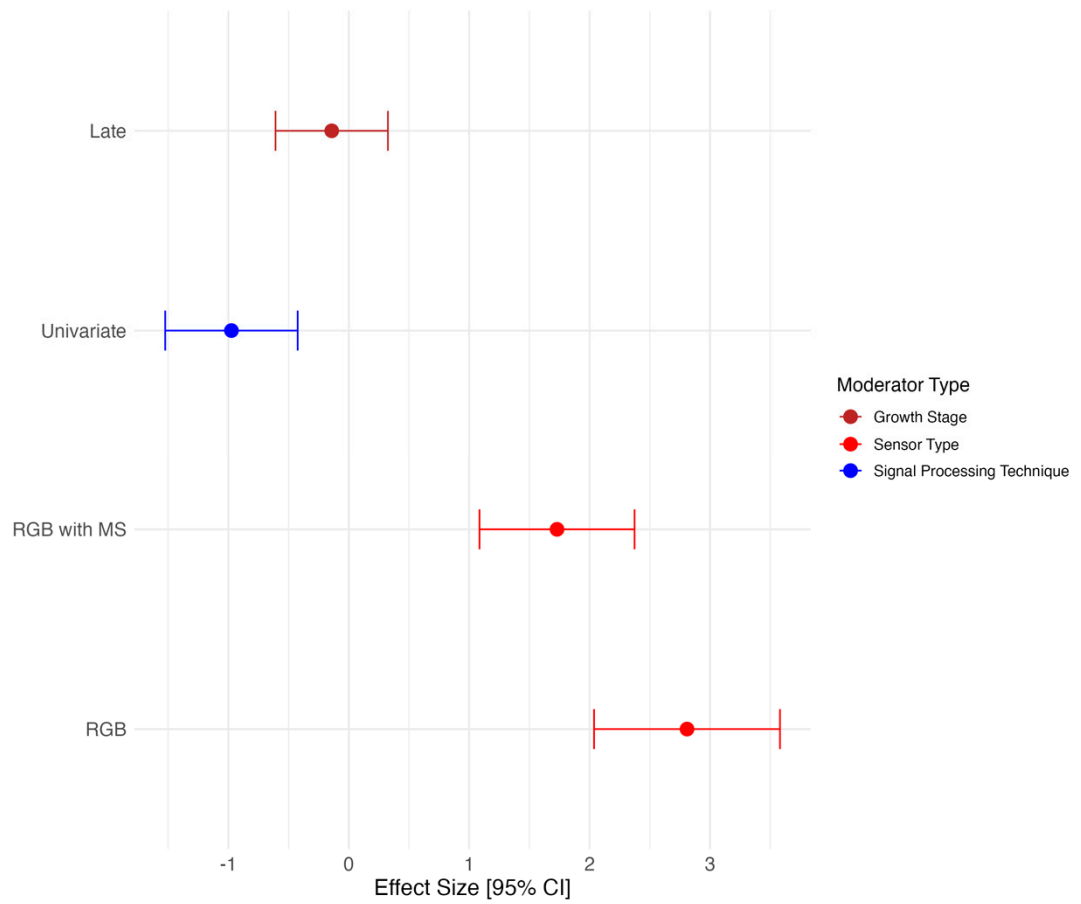

**Figure S3.** Observed Fisher's  $Z$  effect sizes with their 95% confidence interval for Plant Height. HSI: Hyperspectral sensors; MS: Multispectral sensors; LiDAR: Light Detection and Ranging.
