# Supplementary material for: Meta-Analysis Assessing Potential of Drone Remote Sensing in Estimating Plant Traits Related to Nitrogen Use Efficiency
Source: MDPI journal article supplement (doi:10.3390/rs16050838), 2024-02-28
Supplement: s1 [file s1]

# **Meta-Analysis Assessing Potential of Drone Remote Sensing in Estimating Plant Traits Related to Nitrogen Use Efficiency**

Jingcheng Zhang, Yuncai Hu, Fei Li, Kadeghe G. Fae and Kang Yu

(NUE\* or NNI\* or PFP\* or NBI\* or PNB\* or NUtE\* or NHI\* or NUpE\* or TNdff\* or VNF\* or NdfF\* or NRE\* or PNB\* or Nitrogen-use-efficiency\* or N-use-efficiency\* or Partial-factor-productivity\* or Agronomic-N-use-efficiency\* or Nitrogen-Balance-Intensity\* or Recovery-Efficiency-of-Nitrogen-Fertilizer\* or Partial-Nitrogen-Balance\* or Agronomic-Efficiency\* or Physiological-Efficiency\* or Internal-Efficiency\* or Total-Nitrogen-derived-from-Fertilizer\* or fertilizer-Nitrogen-Recovery-Efficiency\* or Nitrogen-Utilization-Efficiency\* or Nitrogen-Harvest-Index\* or Nitrogen-Uptake-efficiency\* or Nitrogen-derived-from-Fertilizer\* or Nitrogen-Productivity\* or Nitrogen-balance-Index-of-a-System\* or Virtual-Nitrogen-factor\*) and (UAV\* or drone\* or Unmanned-Aerial-Vehicle\* or UAS\* or unmanned-aircraft-system\* or remotely-piloted-aircraft\*) from January 1, 1995 to January 20, 2024

| Engine search  | Search string                                                                                                                                                                                                                                                                                                                                                                                                                                                                                                                                                                                                                                                                                                                                                                                                                                                                                                                                                                                                                                                                                                                                                                   | Hits                                                       | Number of literatures |
|----------------|---------------------------------------------------------------------------------------------------------------------------------------------------------------------------------------------------------------------------------------------------------------------------------------------------------------------------------------------------------------------------------------------------------------------------------------------------------------------------------------------------------------------------------------------------------------------------------------------------------------------------------------------------------------------------------------------------------------------------------------------------------------------------------------------------------------------------------------------------------------------------------------------------------------------------------------------------------------------------------------------------------------------------------------------------------------------------------------------------------------------------------------------------------------------------------|------------------------------------------------------------|-----------------------|
| Web of Science | <p>TI = (NUE* or NNI* or PFP* or NBI* or PNB* or NUtE* or NHI* or NUpE* or TNdff* or VNF* or NdfF* or NRE* or PNB* or Nitrogen-use-efficiency* or N-use-efficiency* or Partial-factor-productivity* or Agronomic-N-use-efficiency* or Nitrogen-Balance-Intensity* or Recovery-Efficiency-of-Nitrogen-Fertilizer* or Partial-Nitrogen-Balance* or Agronomic-Efficiency* or Physiological-Efficiency* or Internal-Efficiency* or Total-Nitrogen-derived-from-Fertilizer* or fertilizer-Nitrogen-Recovery-Efficiency* or Nitrogen-Utilization-Efficiency* or Nitrogen-Harvest-Index* or Nitrogen-Uptake-efficiency* or Nitrogen-derived-from-Fertilizer* or Nitrogen-Productivity* or Nitrogen-balance-Index-of-a-System* or Virtual-Nitrogen-factor*) and (UAV* or drone* or Unmanned-Aerial-Vehicle* or UAS* or unmanned-aircraft-system* or remotely-piloted-aircraft*)</p> <p>OR AB = (NUE* or NNI* or PFP* or NBI* or PNB* or NUtE* or NHI* or NUpE* or TNdff* or VNF* or NdfF* or NRE* or PNB* or Nitrogen-use-efficiency* or N-use-efficiency* or Partial-factor-productivity* or Agronomic-N-use-efficiency* or Nitrogen-Balance-Intensity* or Recovery-Efficiency-of-</p> | Title + Abstract +<br>Author<br>Keywords +<br>Keyword Plus | 116                   |

Nitrogen-Fertilizer\* or Partial-Nitrogen-Balance\* or Agronomic-Efficiency\* or Physiological-Efficiency\* or Internal-Efficiency\* or Total-Nitrogen-derived-from-Fertilizer\* or fertilizer-Nitrogen-Recovery-Efficiency\* or Nitrogen-Utilization-Efficiency\* or Nitrogen-Harvest-Index\* or Nitrogen-Uptake-efficiency\* or Nitrogen-derived-from-Fertilizer\* or Nitrogen-Productivity\* or Nitrogen-balance-Index-of-a-System\* or Virtual-Nitrogen-factor\*) and (UAV\* or drone\* or Unmanned-Aerial-Vehicle\* or UAS\* or unmanned-aircraft-system\* or remotely-piloted-aircraft\*)

OR AK = (NUE\* or NNI\* or PFP\* or NBI\* or PNB\* or NUtE\* or NHI\* or NUpE\* or TNdff\* or VNF\* or Ndff\* or NRE\* or PNB\* or Nitrogen-use-efficiency\* or N-use-efficiency\* or Partial-factor-productivity\* or Agronomic-N-use-efficiency\* or Nitrogen-Balance-Intensity\* or Recovery-Efficiency-of-Nitrogen-Fertilizer\* or Partial-Nitrogen-Balance\* or Agronomic-Efficiency\* or Physiological-Efficiency\* or Internal-Efficiency\* or Total-Nitrogen-derived-from-Fertilizer\* or fertilizer-Nitrogen-Recovery-Efficiency\* or Nitrogen-Utilization-Efficiency\* or Nitrogen-Harvest-Index\* or Nitrogen-Uptake-efficiency\* or Nitrogen-derived-from-Fertilizer\* or Nitrogen-Productivity\* or Nitrogen-balance-Index-of-a-System\* or Virtual-Nitrogen-factor\*) and (UAV\* or drone\* or Unmanned-Aerial-Vehicle\* or UAS\* or unmanned-aircraft-system\* or remotely-piloted-aircraft\*)

OR KP = (NUE\* or NNI\* or PFP\* or NBI\* or PNB\* or NUtE\* or NHI\* or NUpE\* or TNdff\* or VNF\* or Ndff\* or NRE\* or PNB\* or Nitrogen-use-efficiency\* or N-use-efficiency\* or Partial-factor-productivity\* or Agronomic-N-use-efficiency\* or Nitrogen-Balance-Intensity\* or Recovery-Efficiency-of-Nitrogen-Fertilizer\* or Partial-Nitrogen-Balance\* or Agronomic-Efficiency\* or Physiological-Efficiency\* or Internal-Efficiency\* or Total-Nitrogen-derived-from-Fertilizer\* or fertilizer-Nitrogen-Recovery-Efficiency\* or Nitrogen-Utilization-Efficiency\* or Nitrogen-Harvest-Index\* or Nitrogen-Uptake-

|        |                                                                                                                                                                                                                                                                                                                                                                                                                                                                                                                                                                                                                                                                                                                                                                                                                                                                                                                                                                                                                                                                                                                                                                               |               |     |
|--------|-------------------------------------------------------------------------------------------------------------------------------------------------------------------------------------------------------------------------------------------------------------------------------------------------------------------------------------------------------------------------------------------------------------------------------------------------------------------------------------------------------------------------------------------------------------------------------------------------------------------------------------------------------------------------------------------------------------------------------------------------------------------------------------------------------------------------------------------------------------------------------------------------------------------------------------------------------------------------------------------------------------------------------------------------------------------------------------------------------------------------------------------------------------------------------|---------------|-----|
| Scopus | <p>efficiency* or Nitrogen-derived-from-Fertilizer* or Nitrogen-Productivity* or Nitrogen-balance-Index-of-a-System* or Virtual-Nitrogen-factor*) and (UAV* or drone* or Unmanned-Aerial-Vehicle* or UAS* or unmanned-aircraft-system* or remotely-piloted-aircraft*)</p> <p>(NUE* or NNI* or PFP* or NBI* or PNB* or NUtE* or NHI* or NUpE* or TNdff* or VNF* or Ndff* or NRE* or PNB* or Nitrogen-use-efficiency* or N-use-efficiency* or Partial-factor-productivity* or Agronomic-N-use-efficiency* or Nitrogen-Balance-Intensity* or Recovery-Efficiency-of-Nitrogen-Fertilizer* or Partial-Nitrogen-Balance* or Agronomic-Efficiency* or Physiological-Efficiency* or Internal-Efficiency* or Total-Nitrogen-derived-from-Fertilizer* or fertilizer-Nitrogen-Recovery-Efficiency* or Physiological-Efficiency* or Nitrogen-Utilization-Efficiency* or Nitrogen-Harvest-Index* or Nitrogen-Uptake-efficiency* or Nitrogen-derived-from-Fertilizer* or Nitrogen-Productivity* or Nitrogen-balance-Index-of-a-System* or Virtual-Nitrogen-factor*) and (UAV* or drone* or Unmanned-Aerial-Vehicle* or UAS* or unmanned-aircraft-system* or remotely-piloted-aircraft*)</p> | TITLE-ABS-KEY | 156 |
|--------|-------------------------------------------------------------------------------------------------------------------------------------------------------------------------------------------------------------------------------------------------------------------------------------------------------------------------------------------------------------------------------------------------------------------------------------------------------------------------------------------------------------------------------------------------------------------------------------------------------------------------------------------------------------------------------------------------------------------------------------------------------------------------------------------------------------------------------------------------------------------------------------------------------------------------------------------------------------------------------------------------------------------------------------------------------------------------------------------------------------------------------------------------------------------------------|---------------|-----|

---
